# Supplementary material for: Feasibility and acceptability of self-sampling for Human Papillomavirus (HPV) screening in a rural community in Western Kenya
Source: Research Square preprint supplement (doi:10.21203/rs.3.rs-6732617/v1), 2025-06-26
Supplement: Supplementary file 1 [file bce7e1eef4ac32b47e010d06.docx]

**APPENDIX 1 Interview Guide for Women who Complete Self-sampling**

Thank you for attending the presentation today. We really appreciate your time. Now, I would like to understand your thoughts and feelings about HPV self-sampling – in other words the use of these kits to screen for cervical cancer rather than going to a clinic. We need advice from women like you who would be doing this in their home or in a private place when attending community meetings.

1. First tell me what brought you to the presentation today?
2. Did you know anything about cervical cancer in women before today? Did you know anyone who had cervical cancer?
3. Do you have thoughts about why women get cervical cancer? Do you think that cervical cancer could happen to you?
4. What was particularly interesting about the presentation today? What did you learn that you didn’t know before?

1. What did you think about when they passed out the kit? Were the instructions helpful? What would you suggest could be changed?
2. Tell me what it was like **to use the kit**? What would have made it easier to use? Do you think you would use the kit if it was mailed to you?
3. What would stop you from using the kit?
4. Health care providers think this might be a good way to have women screen for cervical cancer. What is your opinion?
5. Is there anything else you would like to tell us?

**APPENDIX 2 Interview Guide for Women who do not complete self-sampling**

Thank you for attending the presentation today. We really appreciate your time. Now, I would like to understand your thoughts and feelings about HPV self-sampling – in other words the use of these kits to screen for cervical cancer rather than going to a clinic. We need advice from women like you who would be doing this in their home or in a private place when attending community meetings.

1. First tell me what brought you to the presentation today?
2. Did you know anything about cervical cancer in women before today? Did you know anyone who had cervical cancer?
3. Do you have thoughts about why women get cervical cancer? Do you think that cervical cancer could happen to you?
4. What was particularly interesting about the presentation today? What did you learn that you didn’t know before?
5. What did you think about when they passed out the kit? Were the instructions helpful? What would you suggest could be changed?
6. Tell me why you decided to **not use the kit** at this time. Do you think you would use the kit if it was mailed to you?
7. Is there anything that could be done that would make it easier for you to use the kit?
8. Health care providers think this might be a good way to have women screen for cervical cancer. What is your opinion?
9. Is there anything else you would like to tell us?
